# Supplementary material
Source: PubMed Central journal article supplement (PMC3249088)
Supplement: supp_M111.266213_9304_Wei_supplementary_data.pdf [file supp_M111.266213_9304_Wei_supplementary_data.pdf]

**Table S1:** Screening for fructose-negative strains

| Strains Name                   | Fructose fermentation* | PCR for <i>fruE</i> gene |
|--------------------------------|------------------------|--------------------------|
| <i>B. longum</i> DCP-1         | +                      | +                        |
| <i>B. longum</i> DCP-2         | +                      | +                        |
| <i>B. longum</i> DCP-3         | +                      | +                        |
| <i>B. longum</i> DCP-4         | +                      | +                        |
| <i>B. longum</i> DCP-5         | +                      | +                        |
| <i>B. longum</i> DCP-6         | +                      | +                        |
| <i>B. longum</i> DCP-7         | +                      | +                        |
| <i>B. longum</i> DCP-8         | +                      | +                        |
| <i>B. longum</i> DCP-9         | +                      | +                        |
| <i>B. longum</i> DCP-10        | +                      | +                        |
| <i>B. longum</i> DCP-11        | +                      | +                        |
| <i>B. longum</i> DCP-12        | +                      | +                        |
| <i>B. longum</i> DCP-13        | +                      | +                        |
| <i>B. longum</i> DCP-14        | +                      | +                        |
| <i>B. longum</i> DCP-15        | +                      | +                        |
| <i>B. longum</i> DCP-16        | +                      | +                        |
| <i>B. longum</i> DCP-17        | +                      | +                        |
| <b><i>B. longum</i> DCP-18</b> | -                      | -                        |
| <i>B. longum</i> DCP-19        | +                      | +                        |
| <i>B. longum</i> DCP-20        | +                      | +                        |
| <i>B. longum</i> DCP-21        | +                      | +                        |
| <i>B. longum</i> DCP-22        | +                      | +                        |
| <i>B. longum</i> DCP-23        | +                      | +                        |
| <i>B. longum</i> DCP-24        | +                      | +                        |

---

|                         |   |   |
|-------------------------|---|---|
| <i>B. longum</i> DCP-25 | + | + |
| <i>B. longum</i> DCP-26 | + | + |
| <i>B. longum</i> DCP-27 | + | + |
| <i>B. longum</i> DCP-28 | + | + |
| <i>B. longum</i> DCP-29 | + | + |
| <i>B. longum</i> DCP-30 | + | + |
| <i>B. longum</i> DCP-31 | + | + |
| <i>B. longum</i> DCP-32 | + | + |
| <i>B. longum</i> DCP-33 | + | + |
| <i>B. longum</i> DCP-34 | + | + |
| <i>B. longum</i> DCP-35 | + | + |
| <i>B. longum</i> DCP-36 | + | + |
| <i>B. longum</i> DCP-37 | + | + |
| <i>B. longum</i> DCP-38 | + | + |
| <i>B. longum</i> DCP-39 | + | + |
| <i>B. longum</i> DCP-40 | + | + |
| <i>B. longum</i> DCP-41 | + | + |
| <i>B. longum</i> DCP-42 | + | + |
| <i>B. longum</i> DCP-43 | + | + |
| <i>B. longum</i> DCP-44 | + | + |
| <i>B. longum</i> DCP-45 | + | + |

---

\*: The fructose fermentation of all strains was determined by using the GEN III MicroPlate™ test panel (Biolog, Hayward) and API 20A system (bioMérieux). The substrates tested were L-arabinose, D-cellobiose, cellulose, D-fructose, D-galactose, D-glucose, lactose, maltose, D-mannose, D-raffinose, starch, sucrose, xylan, D-xylose, glycerol, D-mannitol, rhamnose, D-ribose, D-sorbitol, trehalose, peptone (0.1%, w/v) and yeast extract. All substrates were examined at a final concentration of 0.2%, with the exception of peptone (0.1%, w/v), xylan (1%, w/v) and cellulose (1%, w/v).

**Supplemental Table 2** Proteins identified by ESI-MS/MS

| NCBI nr<br>accession no. | Locus  | Protein<br>Description                                                | Total Score <sup>b</sup> | Matched<br>Peptide number | Peptide sequence         | Sequence<br>Coverage % | %<br>Identify <sup>a</sup> | Delta   |
|--------------------------|--------|-----------------------------------------------------------------------|--------------------------|---------------------------|--------------------------|------------------------|----------------------------|---------|
| gi 23464661              | BL0033 | ABC-type sugar<br>transport system,<br>periplasmic component          | 768                      | 20(10)                    | TANEKDIQK                | 46                     | 100                        | 0.0033  |
|                          |        |                                                                       |                          |                           | VKIITIDGTK               |                        | 100                        | -0.0026 |
|                          |        |                                                                       |                          |                           | NVDVKDAEAK               |                        | 100                        | -0.0079 |
|                          |        |                                                                       |                          |                           | EALDNNTRAY               |                        | 100                        | 0.0003  |
|                          |        |                                                                       |                          |                           | TVTAGLLDKYK              |                        | 100                        | -0.0142 |
|                          |        |                                                                       |                          |                           | TVEKDIEIESK(2)           |                        | 100                        | -0.0016 |
|                          |        |                                                                       |                          |                           | TVGFVAVGPEGGFR           |                        | 100                        | -0.0743 |
|                          |        |                                                                       |                          |                           | AAEAEIPVFTVDR            |                        | 100                        | -0.0136 |
|                          |        |                                                                       |                          |                           | ETAQAVKDYLDGK            |                        | 100                        | -0.0331 |
|                          |        |                                                                       |                          |                           | TFDAASAKEALDNNTR(3)      |                        |                            | -0.0009 |
|                          |        |                                                                       |                          |                           | AAEAEIPVFTVDRNVDVK(2)    |                        |                            | -0.0041 |
|                          |        |                                                                       |                          |                           | NFPDGANGFILEGPAGLSVVK(4) |                        |                            | -0.0035 |
|                          |        |                                                                       |                          |                           | AFEDAGFDLTYSPTQNNQK(2)   |                        |                            | -0.0143 |
| gi 23464661              | BL0033 | COG1879: ABC-type<br>sugar transport system,<br>periplasmic component | 1052                     | 33(18)                    | IITIDGTK                 | 58                     | 100                        | -0.0008 |
|                          |        |                                                                       |                          |                           | TANEKDIQK                |                        | 100                        | -0.0009 |
|                          |        |                                                                       |                          |                           | NVDVKDAEAK               |                        | 100                        | -0.0131 |
|                          |        |                                                                       |                          |                           | TVEKDIEIESK(3)           |                        | 100                        | -0.0052 |
|                          |        |                                                                       |                          |                           | AAEAEIPVFTVDR(2)         |                        | 100                        | -0.0086 |

|             |        |                                                        |      |        |  |                          |     |         |         |
|-------------|--------|--------------------------------------------------------|------|--------|--|--------------------------|-----|---------|---------|
|             |        |                                                        |      |        |  | ETAQAVKDYLDGK(5)         | 100 | 0.0003  |         |
|             |        |                                                        |      |        |  | KAAEAEIPVFTVDR           | 100 | -0.0326 |         |
|             |        |                                                        |      |        |  | VLESQSANWSTDEAK          | 100 | -0.0067 |         |
|             |        |                                                        |      |        |  | TFDAASAKEALDNNTR(3)      | 100 | -0.0045 |         |
|             |        |                                                        |      |        |  | AAEAEIPVFTVDRNVDVK(3)    | 100 | -0.0025 |         |
|             |        |                                                        |      |        |  | NFPDGANGFILEGPAGLSVVK(6) | 100 | -0.0044 |         |
|             |        |                                                        |      |        |  | AFEDAGFDLTYSPTQNNQK(2)   | 100 | -0.0027 |         |
|             |        |                                                        |      |        |  | NALQALVDGDLSYVIEYNPIFGK  | 100 | -0.0110 |         |
|             |        |                                                        |      |        |  | SDNPQFIFAQNDEMGLGAAQAV   | 100 | 0.0180  |         |
|             |        |                                                        |      |        |  | DAAGLK[Oxidation (M)](3) |     |         |         |
| gi 23464661 | BL0033 | ABC-type sugar transport system, periplasmic component | 520  | 10(8)  |  | NVDVKDAEAK               | 23  | 100     | 0.0029  |
|             |        |                                                        |      |        |  | TVEKDIEIESK(3)           | 100 | -0.0026 |         |
|             |        |                                                        |      |        |  | TVGFVAVGPEGGFR           | 100 | 0.0065  |         |
|             |        |                                                        |      |        |  | AAEAEIPVFTVDR            | 100 | -0.0042 |         |
|             |        |                                                        |      |        |  | ETAQAVKDYLDGK            | 100 | -0.0081 |         |
|             |        |                                                        |      |        |  | KTVGFVAVGPEGGFR          | 100 | 0.0055  |         |
|             |        |                                                        |      |        |  | TFDAASAKEALDNNTR         | 100 | -0.0058 |         |
|             |        |                                                        |      |        |  | AAEAEIPVFTVDRNVDVK       | 100 | -0.0015 |         |
| gi 23464661 | BL0033 | ABC-type sugar transport system, periplasmic component | 1222 | 37(22) |  | DIEIESK                  | 62  | 100     | -0.0615 |
|             |        |                                                        |      |        |  | TANEKDIQK                | 100 | 0.0037  |         |
|             |        |                                                        |      |        |  | VKIITIDGTK               | 100 | -0.0066 |         |
|             |        |                                                        |      |        |  | NVDVKDAEAK               | 100 | 0.0009  |         |

|             |        |                                                        |      |        |                            |     |         |         |
|-------------|--------|--------------------------------------------------------|------|--------|----------------------------|-----|---------|---------|
|             |        |                                                        |      |        | TVTAGLLDKYK                | 100 | -0.0020 |         |
|             |        |                                                        |      |        | TVEKDIEIESK(3)             | 100 | 0.0006  |         |
|             |        |                                                        |      |        | TVGFVAVGPEGGFR(2)          | 100 | 0.0011  |         |
|             |        |                                                        |      |        | AAEAEIPVFTVDR(3)           | 100 | 0.0018  |         |
|             |        |                                                        |      |        | ETAQAVKDYLDGK(4)           | 100 | 0.0001  |         |
|             |        |                                                        |      |        | KAAEAEIPVFTVDR             | 100 | -0.0062 |         |
|             |        |                                                        |      |        | TFDAASAKEALDNTR(2)         | 100 | 0.0092  |         |
|             |        |                                                        |      |        | AAEAEIPVFTVDRNVDVK(2)      | 100 | 0.0010  |         |
|             |        |                                                        |      |        | NFPDGANGFILEGPAGLSVVK(4)   | 100 | 0.0032  |         |
|             |        |                                                        |      |        | NFPDGANGFILEGPAGLSVVKDR(4) | 100 | 0.0040  |         |
|             |        |                                                        |      |        | AFEDAGFDLTYSPTQNNDQK       | 100 | -0.0097 |         |
|             |        |                                                        |      |        | FVNDEVDAIILSSTEDSGWDDSLK   | 100 | 0.0337  |         |
|             |        |                                                        |      |        | K                          |     |         |         |
|             |        |                                                        |      |        | SDNPQFIFAQNDEMGLGAAQAV     | 100 | 0.0077  |         |
|             |        |                                                        |      |        | DAAGLK[Oxidation (M)](3)   |     |         |         |
|             |        |                                                        |      |        | YKSDNPQFIFAQNDEMGLGAAQ     | 100 | 0.0139  |         |
|             |        |                                                        |      |        | AVDAAGLK[Oxidation (M)]    |     |         |         |
| gi 23464661 | BL0033 | ABC-type sugar transport system, periplasmic component | 1307 | 36(24) | DIEIESK                    | 60  | 100     | -0.0366 |
|             |        |                                                        |      |        | TANEKDIQK                  | 100 | -0.0005 |         |
|             |        |                                                        |      |        | VKIITIDGTK                 | 100 | -0.0064 |         |
|             |        |                                                        |      |        | NVDVKDAEAK                 | 100 | -0.0051 |         |
|             |        |                                                        |      |        | TVEKDIEIESK(4)             | 100 | 0.0016  |         |
|             |        |                                                        |      |        | TVGFVAVGPEGGFR(2)          | 100 | 0.0053  |         |

|             |        |                                                        |      |        |                            |     |         |         |
|-------------|--------|--------------------------------------------------------|------|--------|----------------------------|-----|---------|---------|
|             |        |                                                        |      |        | AAEAEIPVFTVDR(2)           | 100 | 0.0020  |         |
|             |        |                                                        |      |        | ETAQAVKDYLDGK(3)           | 100 | 0.0019  |         |
|             |        |                                                        |      |        | KAAEAEIPVFTVDR             | 100 | -0.0096 |         |
|             |        |                                                        |      |        | TFDAASAKEALDNNTR(3)        | 100 | -0.0051 |         |
|             |        |                                                        |      |        | AAEAEIPVFTVDRNVDVK(2)      | 100 | -0.0017 |         |
|             |        |                                                        |      |        | NFPDGANGFILEGPAGLSVVK(2)   | 100 | 0.0004  |         |
|             |        |                                                        |      |        | NFPDGANGFILEGPAGLSVVKDR(4) | 100 | -0.0020 |         |
|             |        |                                                        |      |        | AFEDAGFDLTYSPTQNNDQOK      | 100 | -0.0154 |         |
|             |        |                                                        |      |        | FVNDEVDAIILSSTEDSGWDDSLK   | 100 | 0.0175  |         |
|             |        |                                                        |      |        | K(2)                       |     |         |         |
|             |        |                                                        |      |        | SDNPQFIFAQNDEMGLGAAQAV     | 100 | 0.0167  |         |
|             |        |                                                        |      |        | DAAGLK[Oxidation (M)](3)   |     |         |         |
|             |        |                                                        |      |        | SDNPQFIFAQNDEMGLGAAQAV     | 100 | 0.0129  |         |
|             |        |                                                        |      |        | DAAGLKGK[Oxidation (M)](2) |     |         |         |
|             |        |                                                        |      |        | YKSDNPQFIFAQNDEMGLGAAQ     | 100 | 0.0181  |         |
|             |        |                                                        |      |        | AVDAAGLK[Oxidation (M)]    |     |         |         |
| gi 23464661 | BL0033 | ABC-type sugar transport system, periplasmic component | 1359 | 41(26) | TANEKDIQK                  | 65  | 100     | -0.0009 |
|             |        |                                                        |      |        | VKIITIDGTK                 | 100 | -0.0026 |         |
|             |        |                                                        |      |        | NVDVKDAEAK                 | 100 | 0.0065  |         |
|             |        |                                                        |      |        | TVEKDIEIESK(4)             | 100 | 0.0006  |         |
|             |        |                                                        |      |        | TVGFVAVGPEGGR(2)           | 100 | 0.0063  |         |
|             |        |                                                        |      |        | AAEAEIPVFTVDR(2)           | 100 | -0.0048 |         |
|             |        |                                                        |      |        | ETAQAVKDYLDGK(4)           | 100 | 0.0011  |         |

|             |        |                                                        |      |        |                            |     |         |         |
|-------------|--------|--------------------------------------------------------|------|--------|----------------------------|-----|---------|---------|
|             |        |                                                        |      |        | KTVGFVAVGPEGGR             | 100 | -0.0105 |         |
|             |        |                                                        |      |        | KAAEAEIPVFTVDR             | 100 | 0.0008  |         |
|             |        |                                                        |      |        | VLESQSANWSTDEAK            | 100 | 0.0061  |         |
|             |        |                                                        |      |        | TFDAASAKEALDNNTR           | 100 | -0.0128 |         |
|             |        |                                                        |      |        | AAEAEIPVFTVDRNVDVK(2)      | 100 | 0.0127  |         |
|             |        |                                                        |      |        | NFPDGANGFILEGPAGLSVVK(4)   | 100 | 0.0016  |         |
|             |        |                                                        |      |        | NFPDGANGFILEGPAGLSVVKDR(4) | 100 | 0.0010  |         |
|             |        |                                                        |      |        | AFEDAGFDLTYSPTQNNDQK(2)    | 100 | 0.0056  |         |
|             |        |                                                        |      |        | FVNDEVDAIILSSTEDSGWDDSLK   | 100 | 0.0322  |         |
|             |        |                                                        |      |        | K                          |     |         |         |
|             |        |                                                        |      |        | SDNPQFIFAQNDEMGLGAAQAV     | 100 | -0.0031 |         |
|             |        |                                                        |      |        | DAAGLK[Oxidation (M)](6)   |     |         |         |
|             |        |                                                        |      |        | SDNPQFIFAQNDEMGLGAAQAV     | 100 | -0.0009 |         |
|             |        |                                                        |      |        | DAAGLKGK[Oxidation (M)](2) |     |         |         |
|             |        |                                                        |      |        | YKSDNPQFIFAQNDEMGLGAAQ     | 100 | 0.0208  |         |
|             |        |                                                        |      |        | AVDAAGLK[Oxidation (M)]    |     |         |         |
| gi 23464661 | BL0033 | ABC-type sugar transport system, periplasmic component | 1612 | 44(27) | QIQAFNK                    | 67  | 100     | -0.0039 |
|             |        |                                                        |      |        | TANEKDIQK                  | 100 | 0.0007  |         |
|             |        |                                                        |      |        | VKIITIDGTK                 | 100 | -0.0016 |         |
|             |        |                                                        |      |        | NVDVKDAEAK                 | 100 | -0.0027 |         |
|             |        |                                                        |      |        | EALDNNTRAY                 | 100 | -0.0033 |         |
|             |        |                                                        |      |        | TVEKDIEIESK(4)             | 100 | 0.0002  |         |
|             |        |                                                        |      |        | TVGFVAVGPEGGR(2)           | 100 | 0.0073  |         |

|             |        |                                                        |     |        |  |                            |     |         |         |
|-------------|--------|--------------------------------------------------------|-----|--------|--|----------------------------|-----|---------|---------|
|             |        |                                                        |     |        |  | AAEAEIPVFTVDR(2)           | 100 | 0.0038  |         |
|             |        |                                                        |     |        |  | ETAQAVKDYLDGK(4)           | 100 | -0.0011 |         |
|             |        |                                                        |     |        |  | KTVGFVAVGPEGGFR            | 100 | -0.0453 |         |
|             |        |                                                        |     |        |  | KAAEAEIPVFTVDR             | 100 | -0.0360 |         |
|             |        |                                                        |     |        |  | VLESQSANWSTDEAK(3)         | 100 | -0.0103 |         |
|             |        |                                                        |     |        |  | TFDAASAKEALDNNTR(2)        | 100 | -0.0360 |         |
|             |        |                                                        |     |        |  | AAEAEIPVFTVDRNVDVK(2)      | 100 | 0.0040  |         |
|             |        |                                                        |     |        |  | NFPDGANGFILEGPAGLSVVK(3)   | 100 | 0.0120  |         |
|             |        |                                                        |     |        |  | NFPDGANGFILEGPAGLSVVKDR(5) | 100 | -0.0077 |         |
|             |        |                                                        |     |        |  | AFEDAGFDLTYSPTQNNQK(3)     | 100 | -0.0018 |         |
|             |        |                                                        |     |        |  | FVNDEVDAIILSSTEDSGWDDSLK   | 100 | 0.0214  |         |
|             |        |                                                        |     |        |  | K                          |     |         |         |
|             |        |                                                        |     |        |  | SDNPQFIFAQNDEMGLGAAQAV     | 100 | -0.0004 |         |
|             |        |                                                        |     |        |  | DAAGLK[Oxidation (M)](3)   |     |         |         |
|             |        |                                                        |     |        |  | SDNPQFIFAQNDEMGLGAAQAV     | 100 | 0.0126  |         |
|             |        |                                                        |     |        |  | DAAGLKGK[Oxidation (M)](2) |     |         |         |
|             |        |                                                        |     |        |  | YKSDNPQFIFAQNDEMGLGAAQ     | 100 | 0.0244  |         |
|             |        |                                                        |     |        |  | AVDAAGLK[Oxidation (M)]    |     |         |         |
| gi 23464661 | BL0033 | ABC-type sugar transport system, periplasmic component | 934 | 25(14) |  | DIEIESK                    | 48  | 100     | -0.0279 |
|             |        |                                                        |     |        |  | IITIDGTK                   | 100 | -0.0058 |         |
|             |        |                                                        |     |        |  | NVDVKDAEAK(2)              | 100 | -0.0001 |         |
|             |        |                                                        |     |        |  | TVEKDIEIESK                | 100 | -0.1194 |         |
|             |        |                                                        |     |        |  | TVGFVAVGPEGGFR             | 100 | -0.0325 |         |



---

|                            |     |         |
|----------------------------|-----|---------|
| AAEAEIPVFTVDR              | 100 | -0.0438 |
| ETAQAVKDYLDGK(3)           | 100 | 0.0015  |
| TFDAASAKEALDNNTR(2)        | 100 | -0.0171 |
| AAEAEIPVFTVDRNVDVK(2)      | 100 | -0.0119 |
| NFPDGANGFILEGPAGLSVVK(2)   | 100 | -0.0040 |
| NFPDGANGFILEGPAGLSVVKDR(4) | 100 | 0.0012  |
| AFEDAGFDLTYSPTQNNQK(2)     | 100 | -0.0053 |
| SDNPQFIFAQNDMGLGAAQAV      | 100 | 0.0017  |
| DAAGLK[Oxidation (M)](2)   |     |         |
| YKSDNPQFIFAQNDMGLGAAQ      | 100 | 0.0118  |
| AVDAAGLK[Oxidation (M)]    |     |         |

---

- a) Percentage of identity between the amino acids present in MS/MS tag and the sequences in databases.
- b) Ion scores greater than 44 are significant ( $p < 0.05$ ), total score is the sum of every ion score.

**Figure S1A**

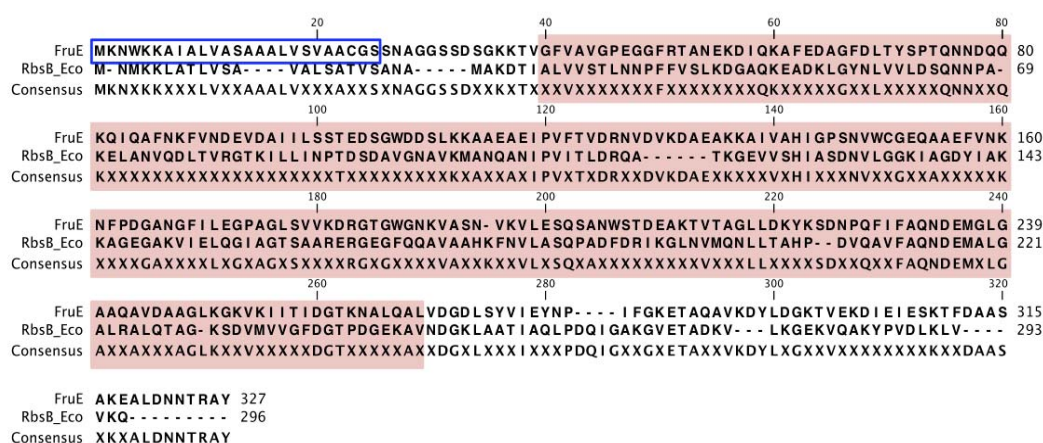

**Fig. S1A:** Alignment of the amino acid sequences of FruE (BL0033) and RbsB of *E. coli* K-12 MG1655 with predicted signal peptide (blue box) and the residues of the conserved periplasmic sugar binding (light red background). The two proteins show an identity of 28.6% and a similarity of 45.5%.

**Figure S1B**

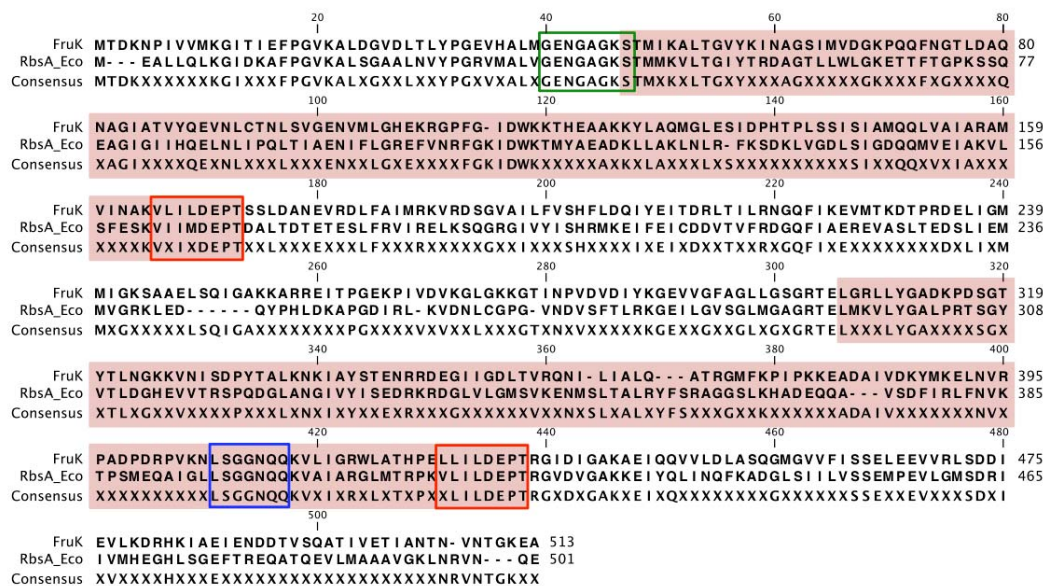

**Fig. S1B:** Alignment of the amino acid sequences of FruK (BL0034) and RbsB with motifs Walker A (GXXGXGKS, green box) and Walker B (X<sub>4</sub>DEPT, residues 166-173 and 426-433, red boxes) as well as the conserved signature motif (LSGGNQQ/RQ, residues 406-412). The conserved ATP-binding cassette domains are marked by a light red background. The two proteins 37.5% identity and 57.7% similarity.

**Figure S1C**

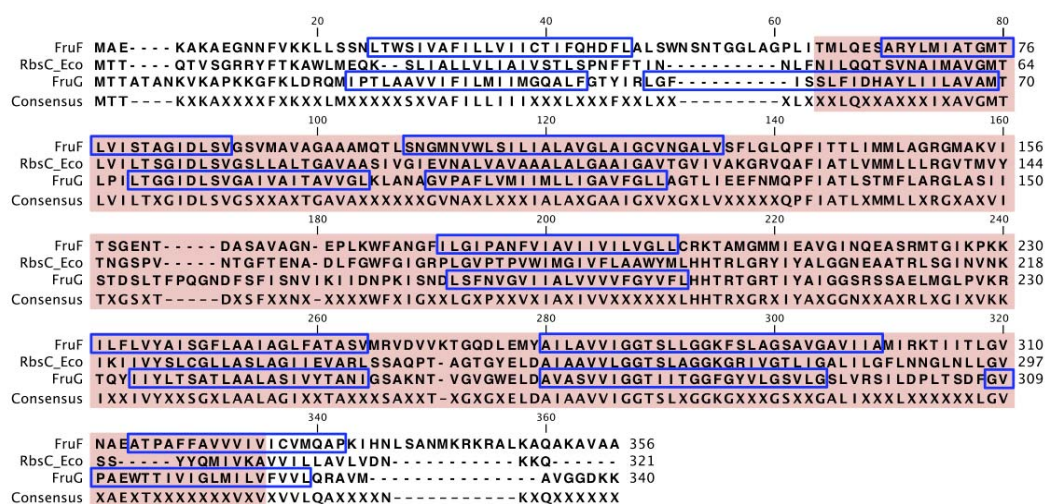

**Fig. S1C:** Alignment of the amino acid sequences of FruF (BL0035), FruG (BL0036) and RbsC with the conserved ABC-transporter permease domain marked by a light red background, predicted transmembrane helices are indicated by blue boxes. The Similarity and identity between the FruF and RbsC are 30.8 and 51.0% respectively. FruG and RbsC share 31.4% identical and 54.0% similar amino acid residues.

**Figure S1D**

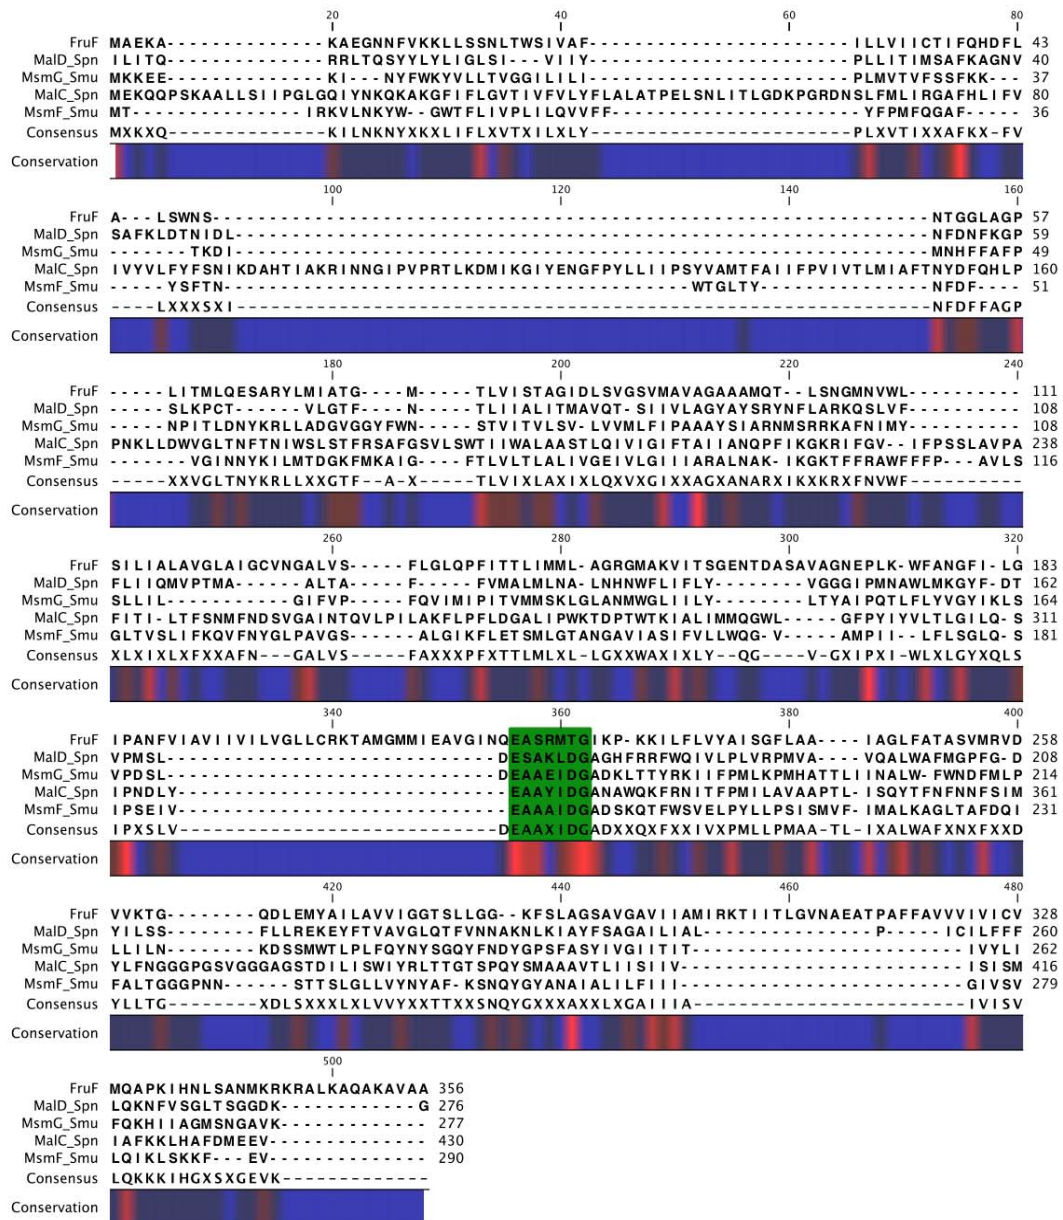

**Fig. S1D:** Alignment of the amino acid sequences of FruF (BL0035) with the ABC sugar transporter permeases MalC and MalD of *Streptococcus pneumoniae* (MalC\_Spn and MalD\_Spn) and MsmF and MsmG of *Streptococcus mutans* (MsmF\_Smu and MsmG\_Smu). Regions of high conservation are indicated by red colour in the conservation plot. The identified EAA motif is marked by green background color.
